# Supplementary material for: Bronchoalveolar Lavage Fluid from Chronic Obstructive Pulmonary Disease Patients Increases Neutrophil Chemotaxis Measured by a Microfluidic Platform
Source: MDPI journal article supplement (doi:10.3390/mi14091740), 2023-09-06
Supplement: s1 [file s1]

## Supporting Information

### Bronchoalveolar Lavage Fluid from Chronic Obstructive Pulmonary Disease Patients Increases Neutrophil Chemotaxis Measured by a Microfluidic Platform

Jiaqi Ren <sup>1,†</sup>, Wenfang Chen <sup>2,†</sup>, Zhicheng Zhong <sup>2,†</sup>, Ning Wang <sup>1,3</sup>, Xi Chen <sup>1</sup>, Hui Yang <sup>1</sup>, Jing Li <sup>2</sup>, Ping Tang <sup>2</sup>, Yanping Fan <sup>3</sup>, Francis Lin <sup>4</sup>, Changqing Bai <sup>2,\*</sup> and Jiandong Wu <sup>1,\*</sup>

<sup>1</sup> Institute of Biomedical and Health Engineering, Shenzhen Institute of Advanced Technology, Chinese Academy of Sciences, Shenzhen 518055, China

<sup>2</sup> Department of Pulmonary and Critical Care Medicine, Shenzhen University General Hospital, Shenzhen 518055, China

<sup>3</sup> School of Optical-Electrical and Computer Engineering, University of Shanghai for Science and Technology, Shanghai 200093, China

<sup>4</sup> Department of Physics and Astronomy, University of Manitoba, Winnipeg, MB R3T 2N2, Canada

\* Correspondence: baicq307@163.com (C.B.); jd.wu@siat.ac.cn (J.W.)

† These authors contributed equally to this work.

**Supplementary Table S1.** The clinical data of COPD participants.

| Patient No. | CAT score | Frequency of COPD (times/year) | Years of onset | mMRC Dyspnea Scale | GOLD stage | pO <sub>2</sub> (mmHg) | pCO <sub>2</sub> (mmHg) | pH    | WBC (10 <sup>9</sup> L <sup>-1</sup> ) | Neutrophil (10 <sup>9</sup> L <sup>-1</sup> ) |
|-------------|-----------|--------------------------------|----------------|--------------------|------------|------------------------|-------------------------|-------|----------------------------------------|-----------------------------------------------|
| 1           | 20        | 1                              | 10             | 1                  | 3          | 69                     | 45.9                    | 7.38  | 6.96                                   | 4.47                                          |
| 2           | 15        | 1                              | 3              | 1                  | 2          | 51                     | 38.6                    | 7.423 | 7.15                                   | 4.31                                          |
| 3           | 21        | 1                              | 10             | 1                  | 2          | 69.7                   | 33.3                    | 7.4   | 9.2                                    | 6.5                                           |
| 4           | 15        | 1                              | 22             | 1                  | 3          | 82                     | 42                      | 7.429 | 10.2                                   | 8                                             |
| 5           | 22        | 2                              | 30             | 3                  | 3          | 79                     | 44.3                    | 7.428 | 4.83                                   | 2.45                                          |
| 6           | 11        | 1                              | 2              | 1                  | 2          | 64                     | 32.4                    | 7.473 | 4.71                                   | 3.41                                          |
| 7           | 8         | 1                              | 30             | 0                  | 2          | 81                     | 34.5                    | 7.37  | 7.21                                   | 4.59                                          |
| 8           | 11        | 2                              | 20             | 2                  | 2          | 68                     | 41.6                    | 7.422 | 5.62                                   | 3.52                                          |

**Supplementary Table S2.** Linear regression analyses of neutrophil migration in COPD BALF samples against patients' clinical data.  $p \leq 0.05$  (\*) was considered statistically significant. mMRC, Modified Medical Research Council; GOLD, Global Initiative for Chronic Obstructive Lung Disease; CAT, COPD Assessment Test; WBC, white blood cell.

| Variables                                         | Equation                       | $r^2$     | $p$     |
|---------------------------------------------------|--------------------------------|-----------|---------|
| Velocity vs. COPD patients' clinical data         |                                |           |         |
| Velocity vs. FEV%                                 | $Y = 257.8 \times X + 30.74$   | 0.3976    | 0.0937  |
| Velocity vs. FVC%                                 | $Y = 161.5 \times X + 62.18$   | 0.2586    | 0.1982  |
| Velocity vs. CAT score                            | $Y = -120.6 \times X + 23.59$  | 0.5484    | 0.0356* |
| Velocity vs. frequency of COPD                    | $Y = 1.029 \times X + 1.180$   | 0.005055  | 0.8671  |
| Velocity vs. years of onset                       | $Y = 181.0 \times X + 3.539$   | 0.2663    | 0.1905  |
| Velocity vs. mMRC Dyspnea Scale                   | $Y = -11.68 \times X + 2.046$  | 0.1775    | 0.2986  |
| Velocity vs. GOLD Stage                           | $Y = -6.541 \times X + 2.821$  | 0.1633    | 0.3208  |
| Velocity vs. pH                                   | $Y = -0.5011 \times X + 7.450$ | 0.2457    | 0.2116  |
| Velocity vs. pO <sub>2</sub> (mmHg)               | $Y = 106.9 \times X + 63.18$   | 0.1096    | 0.4231  |
| Velocity vs. pCO <sub>2</sub> (mmHg)              | $Y = -31.65 \times X + 41.23$  | 0.03815   | 0.6430  |
| Velocity vs. WBC ( $10^9 \text{ L}^{-1}$ )        | $Y = 3.250 \times X + 6.764$   | 0.002800  | 0.9010  |
| Velocity vs. neutrophil ( $10^9 \text{ L}^{-1}$ ) | $Y = 1.126 \times X + 4.579$   | 0.0004044 | 0.9623  |
| C. I. vs. COPD patients' clinical data            |                                |           |         |
| C. I. vs. FEV%                                    | $Y = -100.9 \times X + 78.08$  | 0.3729    | 0.1078  |
| C. I. vs. FVC%                                    | $Y = -38.10 \times X + 84.43$  | 0.08800   | 0.4756  |
| C. I. vs. CAT score                               | $Y = 2.767 \times X + 14.56$   | 0.001765  | 0.9213  |
| C. I. vs. frequency of COPD                       | $Y = -2.802 \times X + 2.077$  | 0.2291    | 0.2302  |
| C. I. vs. years of onset                          | $Y = -74.90 \times X + 37.97$  | 0.2788    | 0.1786  |
| C. I. vs. mMRC Dyspnea Scale                      | $Y = -2.827 \times X + 2.084$  | 0.06360   | 0.5468  |
| C. I. vs. GOLD Stage                              | $Y = 1.201 \times X + 2.021$   | 0.03370   | 0.6634  |
| C. I. vs. pH                                      | $Y = 0.07768 \times X + 7.393$ | 0.03611   | 0.6522  |
| C. I. vs. pO <sub>2</sub> (mmHg)                  | $Y = -36.13 \times X + 81.12$  | 0.07657   | 0.5070  |
| C. I. vs. pCO <sub>2</sub> (mmHg)                 | $Y = -2.502 \times X + 39.81$  | 0.001458  | 0.9285  |
| C. I. vs. WBC ( $10^9 \text{ L}^{-1}$ )           | $Y = -8.189 \times X + 9.401$  | 0.1087    | 0.4251  |
| C. I. vs. neutrophil ( $10^9 \text{ L}^{-1}$ )    | $Y = -5.812 \times X + 6.371$  | 0.06586   | 0.5395  |
